# Supplementary material for: Microbiome profile of the amniotic fluid as a predictive biomarker of perinatal outcome
Source: PubMed Central journal article supplement (PMC5610236; doi:10.1038/s41598-017-11699-8), 2017-09-22
Supplement: 41598_2017_11699_MOESM1_ESM.pdf [file 41598_2017_11699_MOESM1_ESM.pdf]

## Supplementary Information

### Microbiome profile of the amniotic fluid as a predictive biomarker of perinatal outcome

Daichi Urushiyama<sup>1,2</sup>, Wataru Suda<sup>3,4</sup>, Eriko Ohnishi<sup>1</sup>, Ryota Araki<sup>2</sup>, Chihiro Kiyoshima<sup>2</sup>, Masamitsu Kurakazu<sup>2</sup>, Ayako Sanui<sup>5</sup>, Fusanori Yotsumoto<sup>2</sup>, Masaharu Murata<sup>5</sup>, Kazuki Nabeshima<sup>6</sup>, Shin'ichiro Yasunaga<sup>7</sup>, Shigeru Saito<sup>8</sup>, Makoto Nomiyama<sup>9</sup>, Masahira Hattori<sup>3,10</sup>, Shingo Miyamoto<sup>2</sup>, Kenichiro Hata<sup>1\*</sup>

<sup>1</sup>Department of Maternal-Fetal Biology, National Research Institute for Child Health and Development, Tokyo 157-8535, Japan

<sup>2</sup>Department of Obstetrics and Gynecology, Faculty of Medicine, Fukuoka University, Fukuoka 814-0180, Japan

<sup>3</sup>Department of Computational Biology, Graduate School of Frontier Sciences, The University of Tokyo, Chiba 277-8561, Japan

<sup>4</sup>Department of Microbiology and Immunology, Keio University School of Medicine, Tokyo 160-0016, Japan

<sup>5</sup>Center for Maternal, Fetal and Neonatal Medicine, Fukuoka University Hospital, Fukuoka, 814-0180, Japan

<sup>6</sup>Department of Pathology, Fukuoka University School of Medicine and Hospital, Fukuoka 814-0180, Japan

<sup>7</sup>Department of Biochemistry, Faculty of Medicine, Fukuoka University, Fukuoka 814-0180,  
Japan

<sup>8</sup>Department of Obstetrics and Gynecology, University of Toyama, Toyama 930-0194, Japan

<sup>9</sup>Department of Obstetrics and Gynecology, National Hospital Organization Saga Hospital, Saga  
849-8577, Japan

<sup>10</sup>Cooperative Major in Advanced Health Science, Graduate School of Advanced Science and  
Engineering, Waseda University, Tokyo 169-8555, Japan

**\*Corresponding Author:** Kenichiro Hata, MD, PhD

Director,

Department of Maternal-Fetal Biology

National Research Institute for Child Health and Development

2-10-1 Okura, Setagaya, Tokyo 157-8535, Japan

Tel: +81-3-3416-0181

Fax: +81-3-3417-2864

E-mail: [hata-k@ncchd.go.jp](mailto:hata-k@ncchd.go.jp)

## Supplementary Materials and Methods

### *Study design*

Because amniocentesis is an invasive procedure that can result in premature rupture of membranes, iatrogenic preterm birth, and other negative consequences, we used leftover samples of the amniotic fluid (AF) to the full extent permitted by major Japanese guidelines.

To minimize bias, cases with miscarriage, full-term (37 weeks or later) admission, or foetuses with abnormalities (trisomy 21, deformity, tumours) were excluded in assessment of maternal prognostic parameters. Cases with foetuses with major abnormalities or full-term delivery were excluded in assessment of foetal prognostic parameters.

### *Diagnostic criteria*

According to Lencki et al.<sup>20</sup>, clinical chorioamnionitis was diagnosed if patients demonstrated fever  $\geq 38^{\circ}\text{C}$  with no evident infection and at least one of the following signs or symptoms: maternal pulse  $\geq 100$  beats/min, uterine tenderness, malodorous vaginal discharge, or maternal white blood cell count  $\geq 15,000/\text{mm}^3$ . Premature rupture of the membranes was considered to have occurred if we observed evident outflow of weakly alkaline amniotic fluid or detected insulin-like growth factor-binding protein 1 (IGFBP-1) in vaginal discharge.

### *Sequencing of 16S rDNA amplicons*

All sequence data were obtained in two sequencing rounds. Forty-five samples (Fukuoka University Hospital) were sequenced first, 34 (Fukuoka University Hospital, 12; Saga Hospital, 22) samples were sequenced in a second round. To consider contamination in DNA extraction

and library preparation, 32 (Normal AF, 18; Blank, 14) and 30 (Normal AF, 10; Blank, 20) samples were sequenced in the first and second sequencing round, respectively. Moreover, 10 samples in each group were sequenced twice (D1-10, N1-10; "-2" added in sample number were samples sequenced at second time.)

# Supplementary Figures

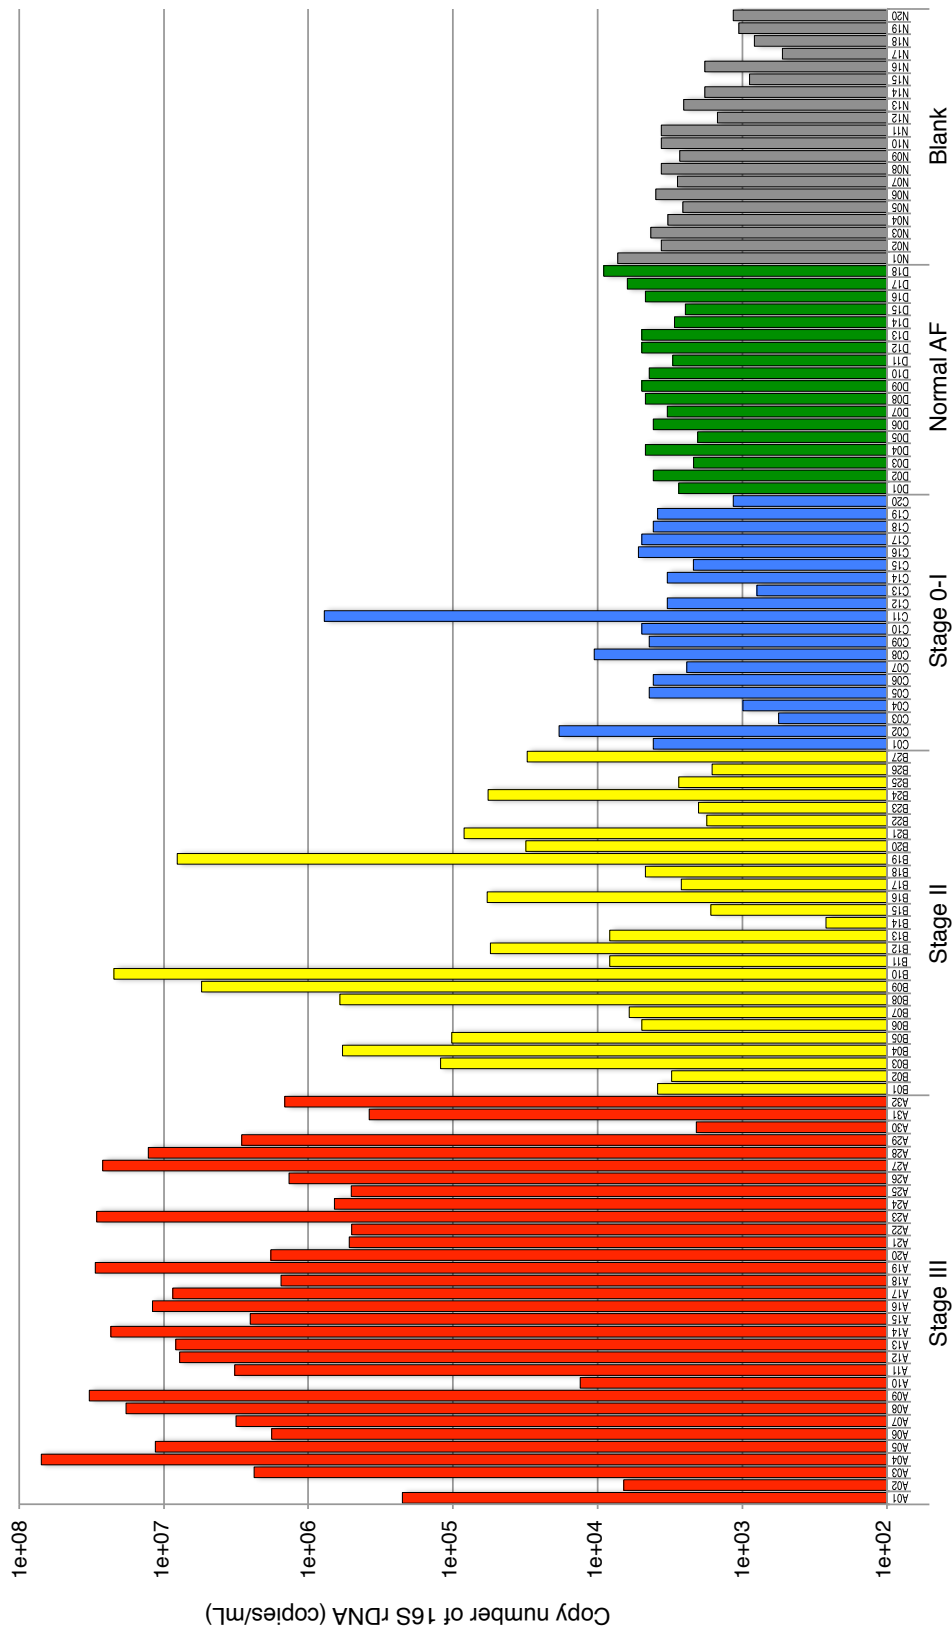

**Fig. S1. Microbial abundance in each sample.** Microbial load was assessed based on 16S rDNA copy numbers per 1 mL AF using dPCR with universal primers 27Fmod and 338R and EvaGreen dye.

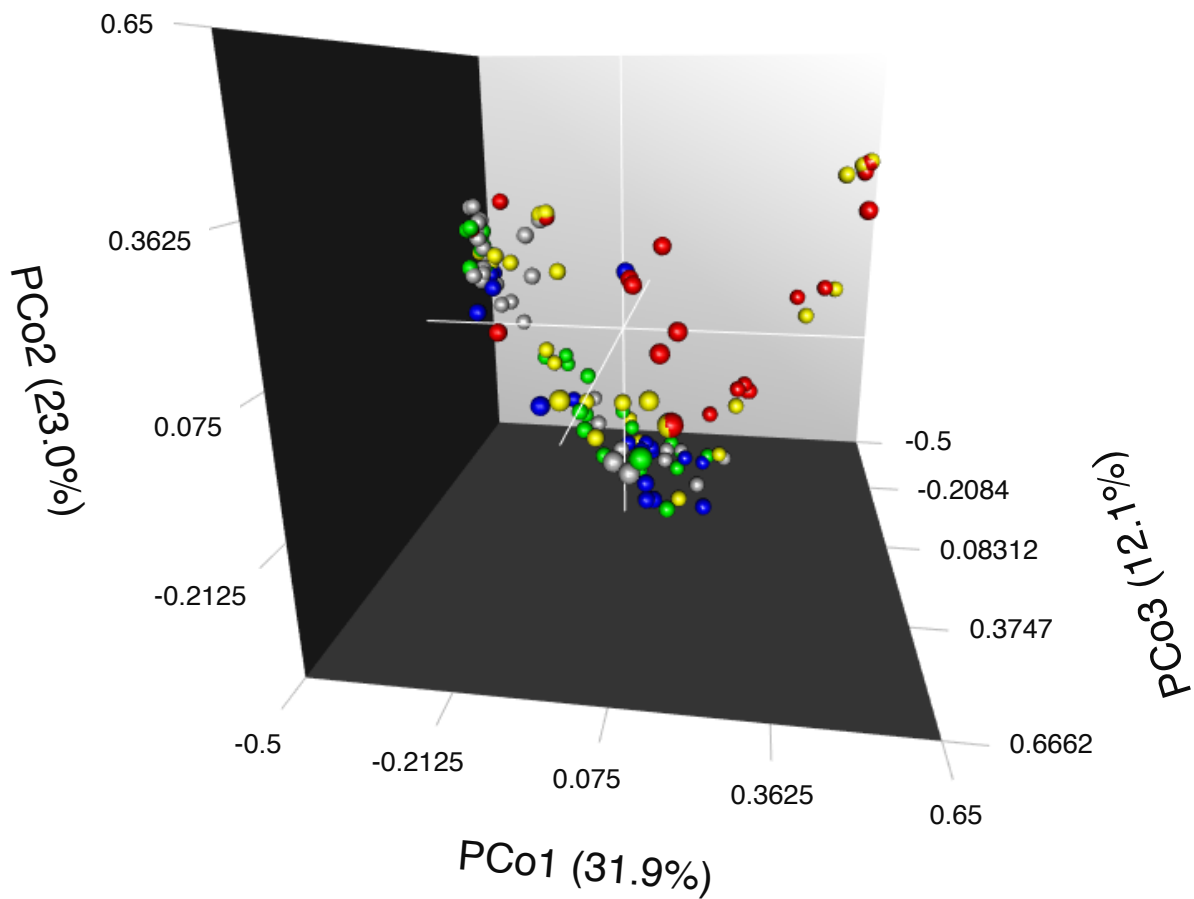

**Fig. S2. 3D-PCoA based on weighted UniFrac distances.** Multidimensional composition of each group was determined based on matrix data for weighted UniFrac distance. Clustering of Stage III (red) samples differed from that of Stage 0-I (blue)/Normal AF (green)/Blank (grey); Stage II (yellow) was scattered between the two clusters. 3D PCoA was conducted with R.

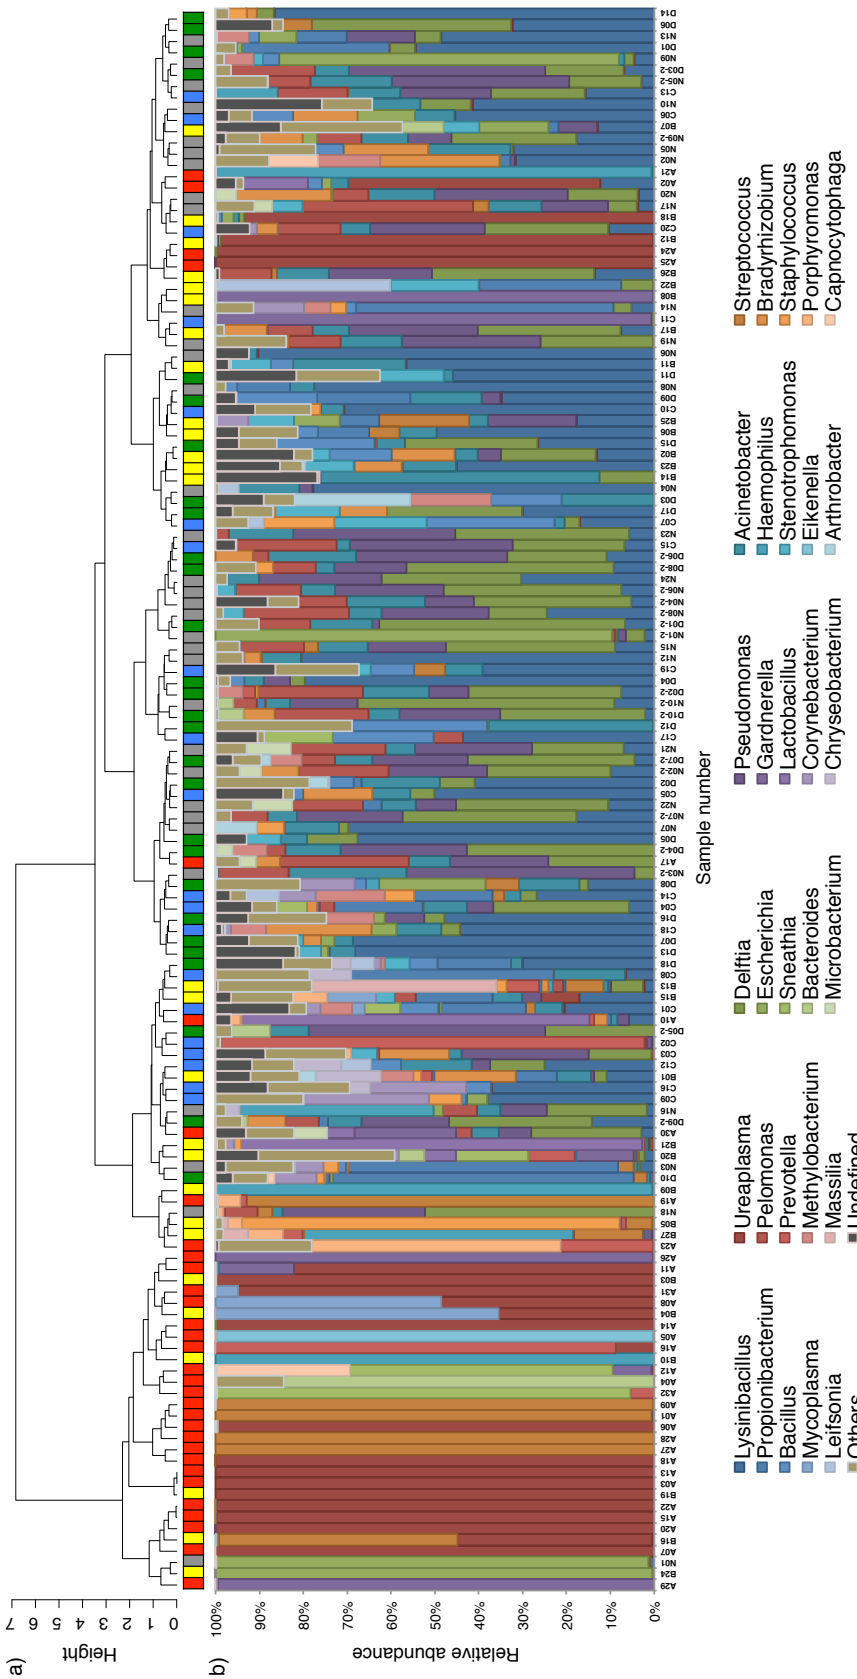



**Fig. S3. Relative abundances of different bacterial genera in each sample.** Sequences were clustered into operational taxonomic units (OTUs) with a 94% identity threshold and taxonomic assignments were performed by similarity search against the standard database. The samples were rearranged by hierarchical cluster analysis using Ward's method based on un-weighted UniFrac distances. Only major genera with top 30 are displayed. Many samples in Stage 0-I/Normal AF/Blank demonstrated a relatively high species richness indicating complex compositions. In contrast, the numbers of species in Stage III and some samples of Stage II were extremely low.

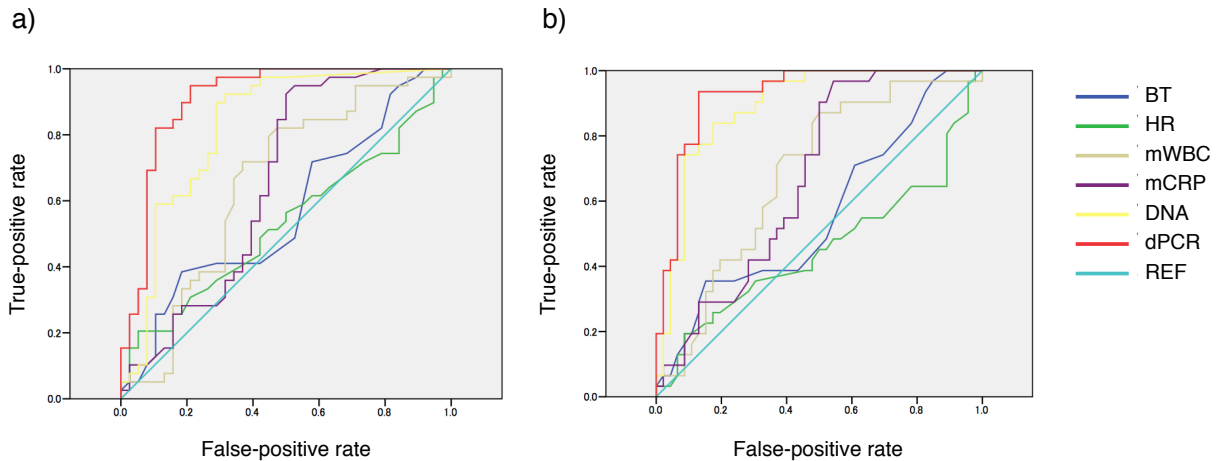

**Fig. S4. Diagnostic and predictive accuracy of clinical and laboratory data, DNA content, and 16S rDNA copy number for miCAM and chorioamnionitis.** Using clinical and laboratory data extracted from medical records, and DNA content and results of digital (d) PCR obtained in this study, we calculated the area under the curve (AUC) and the Youden index for the receiver operating characteristic curve (ROC), cutoff value, and detection sensitivity and specificity. Compared to body temperature (BT), heart rate (HR), white blood cell (WBC) counts, and C-reactive protein (CRP) values in maternal peripheral blood, DNA amount or 16S rDNA copy number per 1 mL of AF were more accurate parameters for the diagnosis of both miCAM and chorioamnionitis; between these, 16S rDNA copy number demonstrated the highest diagnostic accuracy.

## Supplementary Tables

**Table S1. Group definitions.**

| <b>Name</b> | <b>Definition (Blanc's classification)</b>              | <b>Symbol</b> | <b>Sample number</b> |
|-------------|---------------------------------------------------------|---------------|----------------------|
| Stage III   | Chorioamnionitis (Stage III)                            | A             | A1-32                |
| Stage II    | Chorionitis (Stage II)                                  | B             | B1-27                |
| Stage 0-I   | Sub-chorionitis (Stage I) or no neutrophil infiltration | C             | C1-20                |
| Normal AF   | Control of amniotic fluid in normal pregnancy           | D             | D1-18                |
| Blank       | Blank control                                           | N             | N1-24                |

**Table S2. Demographic and clinical characteristics of patients in each group.**

|                                             | (A) Stage III   | (B) Stage II    | (C) Stage 0-I   | <i>P</i> -value<br>(A vs. C) | <i>P</i> -value<br>(B vs. C) | <i>P</i> -value<br>(A vs. B) |
|---------------------------------------------|-----------------|-----------------|-----------------|------------------------------|------------------------------|------------------------------|
| <b>Maternal</b>                             | <b>(n = 32)</b> | <b>(n = 27)</b> | <b>(n = 20)</b> |                              |                              |                              |
| Age (years) †                               | 33.0 (30–38)    | 31.0 (25–36)    | 32.0 (30–34)    | 0.203                        | 0.919                        | 0.154                        |
| Multigravida §                              | 23 (71.9)       | 13 (48.1)       | 5 (25.0)        | 0.002                        | 0.137                        | 0.107                        |
| History of smoking §                        | 5 (15.6)        | 3 (11.1)        | 1 (5.0)         | 0.387                        | 0.626                        | 0.715                        |
| History of cervical operation §             | 6 (18.8)        | 3 (11.1)        | 1 (5.0)         | 0.228                        | 0.626                        | 0.488                        |
| History of arterial abortion §              | 9 (28.1)        | 3 (11.1)        | 2 (10.0)        | 0.170                        | 1.000                        | 0.193                        |
| History of miscarriage or preterm birth §   | 6 (18.8)        | 5 (18.5)        | 0 (0.0)         | 0.228                        | 0.221                        | 1.000                        |
| History of caesarean section §              | 4 (12.5)        | 5 (18.5)        | 3 (15.0)        | 1.000                        | 1.000                        | 0.719                        |
| Hydramnion with preterm labor §             | 0 (0.0)         | 4 (14.8)        | 3 (15.0)        | 0.052                        | 1.000                        | 0.039                        |
| Preterm premature rupture of<br>membranes § | 17 (53.1)       | 5 (18.5)        | 4 (20.0)        | 0.022                        | 1.000                        | 0.008                        |
| Antibiotics before amniocentesis §          | 27 (84.4)       | 18 (66.7)       | 10 (50.0)       | 0.012                        | 0.368                        | 0.134                        |

|                                                                      |                                                              |                                                              |                                                              |       |       |       |
|----------------------------------------------------------------------|--------------------------------------------------------------|--------------------------------------------------------------|--------------------------------------------------------------|-------|-------|-------|
| Drugs for tocolysis §                                                | 23 (71.9)                                                    | 19 (70.4)                                                    | 10 (50.0)                                                    | 0.144 | 0.226 | 1.000 |
| Antenatal corticosteroid before amniocentesis §                      | 22 (68.8)                                                    | 12 (44.4)                                                    | 9 (45.0)                                                     | 0.146 | 1.000 | 0.071 |
| Caesarean section §                                                  | 13 (40.6)                                                    | 14 (51.9)                                                    | 17 (85.0)                                                    | 0.002 | 0.029 | 0.440 |
| Gestational age at amniocentesis (weeks) †                           | 28.71 (26.4–31.8)                                            | 31.14 (26.1–33.8)                                            | 32.36 (29.6–35.3)                                            | 0.009 | 0.182 | 0.230 |
| Body temperature at amniocentesis (°C) †                             | 36.80 (36.6–37.4)                                            | 36.90 (36.7–37.2)                                            | 36.85 (36.4–37.0)                                            | 0.143 | 0.082 | 0.859 |
| Heart rate at amniocentesis (beats/min) †                            | 85.0 (74–104)                                                | 96.0 (84–100)                                                | 81.0 (76–98)                                                 | 0.605 | 0.054 | 0.154 |
| WBC count in maternal peripheral blood at amniocentesis (cells/μL) † | $1.42 \times 10^4$ ( $1.2 \times 10^4$ – $2.0 \times 10^4$ ) | $1.17 \times 10^4$ ( $7.2 \times 10^3$ – $1.9 \times 10^4$ ) | $1.07 \times 10^4$ ( $8.6 \times 10^3$ – $1.2 \times 10^4$ ) | 0.002 | 0.650 | 0.086 |
| CRP in maternal peripheral blood at amniocentesis (mg/dL) ‡          | 2.40 (1.0–5.0; 31)                                           | 1.90 (0.5–4.0; 27)                                           | 0.30 (0.1–1.7; 19)                                           | 0.001 | 0.040 | 0.161 |
| Clinical chorioamnionitis at                                         | 4 (12.5)                                                     | 3 (11.1)                                                     | 1 (5.0)                                                      | 0.634 | 0.626 | 1.000 |

amniocentesis §

|                                                                 |                        |                      |                   |        |       |        |
|-----------------------------------------------------------------|------------------------|----------------------|-------------------|--------|-------|--------|
| WBC in amniotic fluid (cells/ $\mu$ L) ‡                        | 1,091.0 (573–1880; 11) | 1,320.0 (16–3985; 7) | 17.5 (11–24; 2)   | 0.026  | 0.639 | 0.840  |
| Glucose in amniotic fluid (mg/dL) ‡                             | 4.0 (1–14; 24)         | 8.5 (2–20; 12)       | 9.5 (8–31; 4)     | 0.285  | 0.706 | 0.479  |
| Microscopic test by Gram staining method ¶                      | 10/26 (38.5)           | 3/13 (23.1)          | 2/5 (40.0)        | 1.000  | 0.583 | 0.477  |
| Positive culture test of amniotic fluid ¶                       | 11/26 (42.3)           | 4/13 (30.8)          | 2/5 (40.0)        | 1.000  | 1.000 | 0.728  |
| Funisitis of umbilical cord ¶                                   | 19/31 (61.3)           | 4/27 (14.8)          | 2/20 (10.0)       | <0.001 | 1.000 | <0.001 |
| Extended days of hospital stay from admission to birth (days) ‡ | 3.5 (1–9; 30)          | 9.0 (2–23; 25)       | 22.0 (6–45; 17)   | 0.001  | 0.017 | 0.151  |
| Majour complications after birth §                              | 2 (6.3)                | 2 (7.4)              | 2 (10.0)          | 0.634  | 1.000 | 1.000  |
| Days of hospital stay after birth (days) ‡                      | 6.0 (4–7; 32)          | 5.0 (4–6; 27)        | 5.0 (5–8; 19)     | 0.642  | 0.224 | 0.513  |
| <b>Neonatal</b>                                                 | <b>(n = 30)</b>        | <b>(n = 20)</b>      | <b>(n = 12)</b>   |        |       |        |
| Gestational age at birth (weeks) †                              | 28.93 (26.9–32.4)      | 30.71 (26.0–32.8)    | 31.14 (26.9–32.8) | 0.606  | 0.723 | 0.871  |
| Neonatal body weight at birth (g) †                             | 1,146 (990–            | 1,581 (833–          | 1,422 (905–       | 0.790  | 0.893 | 0.495  |

|                                          |                                                                        |                                                                        |                                                                        |       |       |       |
|------------------------------------------|------------------------------------------------------------------------|------------------------------------------------------------------------|------------------------------------------------------------------------|-------|-------|-------|
|                                          | 1,663)                                                                 | 1,989)                                                                 | 1,862)                                                                 |       |       |       |
| Apgar score 1 min †                      | 7.0 (5–8)                                                              | 6.0 (5-8)                                                              | 7.0 (6–8)                                                              | 0.719 | 0.863 | 0.799 |
| Apgar score 5 min †                      | 9.0 (8–9)                                                              | 8.0 (7-9)                                                              | 9.0 (8–9)                                                              | 0.902 | 0.215 | 0.092 |
| Umbilical arterial pH at birth ‡         | 7.350 (7.30–<br>7.39; 29)                                              | 7.343 (7.31–<br>7.40; 20)                                              | 7.347 (7.31–<br>7.37; 12)                                              | 0.805 | 0.752 | 0.705 |
| WBC count after birth (cells/ $\mu$ L) ‡ | $1.65 \times 10^4$ ( $1.0 \times 10^4$ –<br>$2.0 \times 10^4$ ;<br>25) | $1.17 \times 10^4$ ( $9.4 \times 10^3$ –<br>$1.6 \times 10^4$ ;<br>18) | $8.20 \times 10^3$ ( $6.3 \times 10^3$ –<br>$1.2 \times 10^4$ ;<br>10) | 0.008 | 0.111 | 0.160 |
| CRP after birth (mg/dL) ‡                | 0.20 (0.0–0.4;<br>25)                                                  | 0.00 (0.0–0.1;<br>18)                                                  | 0.00 (0.0–0.0;<br>10)                                                  | 0.016 | 0.453 | 0.041 |
| IgM after birth (mg/dL) ‡                | 12.0 (7–15; 16)                                                        | 9.0 (7–10; 14)                                                         | 5.0 (4–8; 9)                                                           | 0.005 | 0.025 | 0.202 |
| Antibiotics for newborn ¶                | 13/16 (81.3)                                                           | 5/15 (33.3)                                                            | 1/9 (11.1)                                                             | 0.002 | 0.351 | 0.011 |
| Sepsis ¶                                 | 3/25 (12.0)                                                            | 3/18 (16.7)                                                            | 1/10 (10.0)                                                            | 1.000 | 1.000 | 0.683 |

†Data shown as median (interquartile range).

‡Data shown as median (interquartile range; n).

§Data shown as n (%).

¶Data shown as n/N (%).

WBC, white blood cell; CRP, C-reactive protein; IgM, immunoglobulin M.



**Table S3. Statistical analysis of UniFrac distance in each group.**

| Category | No. of subjects | PERMANOVA           |                 |                 |                 |
|----------|-----------------|---------------------|-----------------|-----------------|-----------------|
|          |                 | Un-weighted UniFrac |                 | Weighed UniFrac |                 |
|          |                 | R <sup>2</sup>      | P-value         | R <sup>2</sup>  | P-value         |
| A vs B   | A: 32           | 0.04874             | <b>0.000999</b> | 0.06290         | <b>0.003996</b> |
|          | B: 27           |                     |                 |                 |                 |
| A vs C   | A: 32           | 0.11023             | <b>0.000999</b> | 0.18466         | <b>0.000999</b> |
|          | C: 20           |                     |                 |                 |                 |
| A vs D   | A: 32           | 0.12949             | <b>0.000999</b> | 0.23891         | <b>0.000999</b> |
|          | D: 28           |                     |                 |                 |                 |
| A vs N   | A: 32           | 0.12858             | <b>0.000999</b> | 0.23777         | <b>0.000999</b> |
|          | N: 33           |                     |                 |                 |                 |
| B vs C   | B: 27           | 0.03247             | <b>0.036960</b> | 0.06248         | <b>0.004995</b> |
|          | C: 20           |                     |                 |                 |                 |
| B vs D   | B: 27           | 0.03815             | <b>0.003996</b> | 0.06953         | <b>0.002997</b> |
|          | D: 28           |                     |                 |                 |                 |

|        |                |         |                 |         |                 |
|--------|----------------|---------|-----------------|---------|-----------------|
| B vs N | B: 27<br>N: 33 | 0.04993 | <b>0.000999</b> | 0.09704 | <b>0.000999</b> |
| C vs D | C: 20<br>D: 28 | 0.02564 | 0.197800        | 0.03038 | 0.159800        |
| C vs N | C: 20<br>N: 33 | 0.03949 | <b>0.005994</b> | 0.08095 | <b>0.006993</b> |
| D vs N | D: 28<br>N: 33 | 0.02578 | 0.05894         | 0.02967 | 0.13090         |

---

**Table S4. Distribution of patients between miCAM and non-miCAM subgroups.**

| <b>Name</b> | <b>Definition</b>                             | <b>miCAM<br/>(n = 40)</b> | <b>non-miCAM<br/>(n = 39)</b> |
|-------------|-----------------------------------------------|---------------------------|-------------------------------|
| Stage III   | Chorioamnionitis                              | 30                        | 2                             |
| Stage II    | Chorionitis                                   | 8                         | 19                            |
| Stage 0-I   | Sub-chorionitis or no neutrophil infiltration | 2                         | 18                            |

**Table S5. Clinical characteristics of miCAM and non-miCAM patients.**

|                                           | <b>miCAM</b>    | <b>non-miCAM</b> | <b>P-value</b><br><b>(miCAM vs.</b><br><b>non-miCAM)</b> |
|-------------------------------------------|-----------------|------------------|----------------------------------------------------------|
| <b>Histological diagnosis</b>             | <b>(n = 40)</b> | <b>(n = 39)</b>  |                                                          |
| Chorioamnionitis (Blanc's stage III) §    | 30 (75.0)       | 2 (5.1)          | <0.001                                                   |
| Chorionitis (Blanc's stage ≥ II) §        | 38 (95.0)       | 21 (53.8)        | <0.001                                                   |
| Funisitis ¶                               | 20/39 (51.3)    | 5/39 (12.8)      | 0.001                                                    |
| <b>Maternal data</b>                      | <b>(n = 40)</b> | <b>(n = 39)</b>  |                                                          |
| Age (years) †                             | 33.0 (31–37)    | 31.0 (25–35)     | 0.016                                                    |
| Multigravida §                            | 29 (72.5)       | 12 (30.8)        | <0.001                                                   |
| History of smoking §                      | 6 (15.0)        | 3 (7.7)          | 0.481                                                    |
| History of cervical operation §           | 6 (15.0)        | 4 (10.3)         | 0.737                                                    |
| History of arterial abortion §            | 11 (27.5)       | 3 (7.7)          | 0.037                                                    |
| History of miscarriage or preterm birth § | 9 (22.5)        | 3 (7.7)          | 0.115                                                    |

|                                                                      |                          |                         |       |
|----------------------------------------------------------------------|--------------------------|-------------------------|-------|
| History of caesarean section §                                       | 8 (20.0)                 | 4 (10.3)                | 0.348 |
| Hydramnion with preterm labor §                                      | 0 (0.0)                  | 7 (17.9)                | 0.005 |
| Preterm premature rupture of membranes §                             | 17 (42.5)                | 9 (23.1)                | 0.094 |
| Antibiotics before amniocentesis §                                   | 35 (87.5)                | 20 (51.3)               | 0.001 |
| Drugs for tocolysis §                                                | 30 (75.0)                | 22 (56.4)               | 0.100 |
| Antenatal corticosteroid before amniocentesis §                      | 26 (65.0)                | 17 (43.6)               | 0.072 |
| Caesarean section §                                                  | 20 (50.0)                | 24 (61.5)               | 0.367 |
| Gestational age at amniocentesis (weeks) †                           | 28.71 (25.9–32.5)        | 32.00 (28.4–35.4)       | 0.023 |
| Body temperature at amniocentesis(°C) †                              | 36.80 (36.6–37.4)        | 36.90 (36.6–37.1)       | 0.441 |
| Heart rate at amniocentesis (beats/min) †                            | 89.0 (76–104)            | 86.0 (78–99)            | 0.617 |
| WBC count in maternal peripheral blood at amniocentesis (cells/μL) † | 13,850.0 (11,475–20,025) | 10,400.0 (7,200–17,200) | 0.017 |
| CRP in maternal peripheral blood at amniocentesis (mg/dL) †          | 1.85 (0.9–4.5)           | 0.69 (0.1–4.0)          | 0.020 |
| Clinical chorioamnionitis at amniocentesis §                         | 6 (15.0)                 | 2 (5.1)                 | 0.263 |

|                                                                 |                                                              |                                                              |        |
|-----------------------------------------------------------------|--------------------------------------------------------------|--------------------------------------------------------------|--------|
| WBC in amniotic fluid (cells/ $\mu$ L) ‡                        | 1,200.0 (640–3,000; 13)                                      | 27.0 (5–645; 7)                                              | 0.036  |
| Glucose in amniotic fluid (mg/dL) ‡                             | 4.0 (1–12; 26)                                               | 11.5 (2–31; 14)                                              | 0.402  |
| Microscopic test by Gram staining method ¶                      | 12/29 (41.4)                                                 | 3/15 (20.0)                                                  | 0.195  |
| Positive culture test of amniotic fluid ¶                       | 14/29 (48.3)                                                 | 3/15 (20.0)                                                  | 0.104  |
| Amount of DNA per 1 mL of amniotic fluid (ng) †*                | 294.8 (43–1,309)                                             | 8.7 (0–55)                                                   | 0.001  |
| Copy number of 16S rDNA per 1 mL of amniotic fluid (cops) †     | $1.67 \times 10^6$ ( $3.4 \times 10^5$ – $9.0 \times 10^6$ ) | $4.13 \times 10^3$ ( $2.5 \times 10^3$ – $8.3 \times 10^3$ ) | <0.001 |
| Extended days of hospital stay from admission to birth (days) ‡ | 4.0 (0–10; 38)                                               | 18.0 (4–34; 34)                                              | <0.001 |
| Majour complications after birth §                              | 3 (7.5)                                                      | 3 (7.7)                                                      | <0.001 |
| Days of hospital stay after birth (days) ‡                      | 5.0 (4–7; 40)                                                | 5.0 (4–6; 38)                                                | 0.841  |
| <b>Neonatal data</b>                                            | <b>(n = 38)</b>                                              | <b>(n = 24)</b>                                              |        |
| Gestational age at birth (weeks) †                              | 28.93 (26.6–32.5)                                            | 30.71 (26.9–32.5)                                            | 0.816  |
| Neonatal body weight at birth (g) †                             | 1,146.0 (916–1,823)                                          | 1,425.5(872–1,834)                                           | 0.827  |
| Apgar score 1 min †                                             | 7.0 (5–8)                                                    | 6.0 (5–8)                                                    | 0.963  |

|                                    |                                 |                               |       |
|------------------------------------|---------------------------------|-------------------------------|-------|
| Apgar score 5 min †                | 9.0 (8–9)                       | 8.5 (7–9)                     | 0.519 |
| Umbilical arterial pH at birth ‡   | 7.350 (7.31–7.40; 37)           | 7.338 (7.31–7.39; 24)         | 0.605 |
| WBC count after birth (cells/μL) ‡ | 15,250.0 (10,700–20,550;<br>32) | 9,700.0 (7,200–13,900;<br>21) | 0.005 |
| CRP after birth (mg/dL) ‡          | 0.10 (0.0–0.44; 32)             | 0.00 (0.0–0.0; 21)            | 0.044 |
| IgM after birth(mg/dL) ‡           | 11.0 (6–14; 22)                 | 8.0 (5–9; 17)                 | 0.026 |
| Antibiotics for newborn ¶          | 15/23 (65.2)                    | 4 (23.5)                      | 0.012 |
| Sepsis ¶                           | 5 (15.6)                        | 2 (9.5)                       | 0.690 |

---

†Data are shown as median (interquartile range).

‡Data are shown as median (interquartile range; n).

§Data are shown as n (%).

¶Data are shown as n/N (%).

\*Values < 0.2 are shown as 0.

WBC, white blood cell; CRP, C-reactive protein; IgM, immunoglobulin M.

**Table S6. Diagnostic accuracy for miCAM and chorioamnionitis.**

|                                                         | <b>AUC</b> | <b>Cut-off value</b>         | <b>Youden Index</b> | <b>Sensitivity</b> | <b>Specificity</b> |
|---------------------------------------------------------|------------|------------------------------|---------------------|--------------------|--------------------|
| <b>miCAM</b>                                            |            |                              |                     |                    |                    |
| Body temperature at amniocentesis                       | 0.568      | 37.2 °C                      | 0.201               | 0.385              | 0.816              |
| Heart rate at amniocentesis                             | 0.531      | 111.5 beats/min              | 0.152               | 0.205              | 0.947              |
| WBC count in maternal peripheral blood at amniocentesis | 0.652      | 11,950.0 cells/mL            | 0.350               | 0.718              | 0.632              |
| CRP in maternal peripheral blood at amniocentesis       | 0.654      | 0.65 mg/dL                   | 0.423               | 0.923              | 0.500              |
| Amount of DNA per 1 mL of amniotic fluid                | 0.825      | 29.7 ng/mL                   | 0.608               | 0.897              | 0.711              |
| Copy number of 16S rDNA per 1 mL of amniotic fluid      | 0.909      | $1.19 \times 10^4$ copies/mL | 0.738               | 0.949              | 0.789              |
| <b>Chorioamnionitis (Stage III)</b>                     |            |                              |                     |                    |                    |
| Body temperature at amniocentesis                       | 0.561      | 37.3 °C                      | 0.203               | 0.355              | 0.848              |



|                                                         |       |                              |       |       |       |
|---------------------------------------------------------|-------|------------------------------|-------|-------|-------|
| Heart rate at amniocentesis                             | 0.455 | 111.5 beats/min              | 0.107 | 0.194 | 0.913 |
| WBC count in maternal peripheral blood at amniocentesis | 0.683 | 11,200.0 cells/mL            | 0.371 | 0.871 | 0.500 |
| CRP in maternal peripheral blood at amniocentesis       | 0.673 | 0.65 mg/dL                   | 0.425 | 0.968 | 0.457 |
| Amount of DNA per 1 mL of amniotic fluid                | 0.891 | 71.4. ng/mL                  | 0.665 | 0.839 | 0.826 |
| Copy number of 16S rDNA per 1 mL of amniotic fluid      | 0.926 | $1.73 \times 10^4$ copies/mL | 0.805 | 0.935 | 0.870 |

---

AUC, area under curve; WBC, white blood cell; CRP, C-reactive protein

**Table S7. Summary of sequence reads.**

| <b>Group symbol</b> | <b>Sample number</b> | <b>Sample ID</b>     | <b>Number of reads in input for quality filtering</b> | <b>Reads removed</b>                  |                                           |                                |
|---------------------|----------------------|----------------------|-------------------------------------------------------|---------------------------------------|-------------------------------------------|--------------------------------|
|                     |                      |                      |                                                       | <b>Reads lacking primer sequences</b> | <b>Reads with average quality &lt; 25</b> | <b>Possible chimeric reads</b> |
| Stage III           | A01                  | 06G-5th-FU671AFsn    | 10000                                                 | 61                                    | 9                                         | 35                             |
| Stage III           | A02                  | 2S02D-PFU056AFsn-1   | 10000                                                 | 3486                                  | 2                                         | 693                            |
| Stage III           | A03                  | 2S01E-PFU010AFsn-2   | 10000                                                 | 53                                    | 1                                         | 28                             |
| Stage III           | A04                  | 2S01G-PFU025AFsn     | 10000                                                 | 47                                    | 3                                         | 26                             |
| Stage III           | A05                  | 02H-5th-SAGA-016AFsn | 10000                                                 | 51                                    | 2                                         | 14                             |
| Stage III           | A06                  | 02F-5th-SAGA-014AFsn | 10000                                                 | 44                                    | 1                                         | 45                             |
| Stage III           | A07                  | 2S01C-FU090AFsn-1    | 10000                                                 | 42                                    | 2                                         | 25                             |
| Stage III           | A08                  | 2S01A-PFU022AFsn-1   | 10000                                                 | 45                                    | 2                                         | 58                             |
| Stage III           | A09                  | 02E-5th-SAGA-013AFsn | 10000                                                 | 61                                    | 8                                         | 252                            |
| Stage III           | A10                  | 2S02C-PFU082AFsn-1   | 10000                                                 | 3033                                  | 3                                         | 3222                           |

|           |     |                      |       |      |    |     |
|-----------|-----|----------------------|-------|------|----|-----|
| Stage III | A11 | 02B-5th-SAGA-010AFsn | 10000 | 53   | 5  | 82  |
| Stage III | A12 | 2S01H-PFU014AFsn-1   | 10000 | 37   | 1  | 26  |
| Stage III | A13 | 2S01B-FU075AFsn      | 10000 | 51   | 2  | 34  |
| Stage III | A14 | 02C-5th-SAGA-011AFsn | 10000 | 45   | 5  | 39  |
| Stage III | A15 | 2S11H-FU253AFsn      | 10000 | 59   | 3  | 20  |
| Stage III | A16 | 02D-5th-SAGA-012AFsn | 10000 | 40   | 4  | 21  |
| Stage III | A17 | 03B-5th-SAGA-018AFsn | 10000 | 1223 | 0  | 3   |
| Stage III | A18 | 2S11F-FU191AFsn      | 10000 | 40   | 4  | 21  |
| Stage III | A19 | 01G-5th-SAGA-007AFsn | 10000 | 44   | 2  | 20  |
| Stage III | A20 | 2S02A-FU021AFsn-1    | 10000 | 33   | 2  | 19  |
| Stage III | A21 | 2S01F-PFU087AFsn-1   | 10000 | 380  | 0  | 428 |
| Stage III | A22 | 2S01D-PFU020AFsn     | 10000 | 74   | 1  | 76  |
| Stage III | A23 | 01F-5th-SAGA-006AFsn | 10000 | 47   | 28 | 296 |
| Stage III | A24 | 03C-5th-SAGA-019AFsn | 10000 | 39   | 3  | 23  |
| Stage III | A25 | 05H-5th-FU372AFsn    | 10000 | 45   | 6  | 54  |
| Stage III | A26 | 01C-5th-SAGA-003AFsn | 10000 | 62   | 4  | 41  |

|           |     |                      |       |      |    |       |
|-----------|-----|----------------------|-------|------|----|-------|
| Stage III | A27 | 01D-5th-SAGA-004AFsn | 10000 | 33   | 9  | 49    |
| Stage III | A28 | 06B-5th-FU619AFsn    | 10000 | 47   | 0  | 1     |
| Stage III | A29 | 2S02B-PFU026AFsn-1   | 10000 | 107  | 0  | 113   |
| Stage III | A30 | 05G-5th-FU345AFsn    | 10000 | 3318 | 0  | 357   |
| Stage III | A31 | 03E-5th-SAGA-031AF   | 10000 | 43   | 3  | 85    |
| Stage III | A32 | 03F-5th-SAGA-032AF   | 10000 | 48   | 4  | 23    |
| Stage II  | B01 | 2S03D-PFU080AFsn-1   | 20000 | 9910 | 7  | 4967  |
| Stage II  | B02 | 2S11B-FU122AFsn      | 30000 | 9804 | 4  | 16020 |
| Stage II  | B03 | 2S02G-FU080AFsn      | 10000 | 91   | 1  | 10    |
| Stage II  | B04 | 2S02H-PFU018AFsn-1   | 10000 | 61   | 1  | 7     |
| Stage II  | B05 | 02A-5th-SAGA-009AFsn | 10000 | 91   | 13 | 67    |
| Stage II  | B06 | 2S04A-PFU009AFsn-2   | 10000 | 5419 | 2  | 501   |
| Stage II  | B07 | 2S04D-FU001AFsn-1    | 15145 | 8087 | 2  | 4705  |
| Stage II  | B08 | 2S02E-FU099AFsn-1    | 10000 | 177  | 0  | 145   |
| Stage II  | B09 | 01H-5th-SAGA-008AFsn | 10000 | 35   | 1  | 16    |
| Stage II  | B10 | 03A-5th-SAGA-017AFsn | 10000 | 34   | 1  | 0     |

|          |     |                      |       |       |   |      |
|----------|-----|----------------------|-------|-------|---|------|
| Stage II | B11 | 2S03C-PFU115AFsn-1   | 30000 | 18494 | 7 | 6024 |
| Stage II | B12 | 06C-5th-FU647AFsn    | 10000 | 87    | 3 | 31   |
| Stage II | B13 | 02G-5th-SAGA-015AFsn | 10000 | 1148  | 2 | 1281 |
| Stage II | B14 | 2S04E-FU045AFsn-1    | 10426 | 7960  | 2 | 262  |
| Stage II | B15 | 2S04C-PFU013AFsn-1   | 10000 | 5165  | 1 | 172  |
| Stage II | B16 | 2S02F-FU109AFsn      | 10000 | 215   | 3 | 67   |
| Stage II | B17 | 06A-5th-FU516AFsn    | 10000 | 1068  | 0 | 136  |
| Stage II | B18 | 2S03B-FU102AFsn-1    | 10000 | 2323  | 1 | 21   |
| Stage II | B19 | 2S03A-PFU029AFsn-1   | 10000 | 69    | 0 | 55   |
| Stage II | B20 | 2S03F-PFU012AFsn-1   | 10000 | 452   | 7 | 342  |
| Stage II | B21 | 06H-5th-FU795AFsn    | 8431  | 77    | 2 | 26   |
| Stage II | B22 | 2S03E-PFU016AFsn-2   | 44528 | 39792 | 9 | 230  |
| Stage II | B23 | 2S04B-PFU004AFsn3-1  | 10000 | 6483  | 3 | 48   |
| Stage II | B24 | 2S03G-PFU048AFsn-1   | 10000 | 155   | 0 | 6    |
| Stage II | B25 | 2S03H-PFU114AFsn-1   | 20000 | 15136 | 2 | 98   |
| Stage II | B26 | 06D-5th-FU662AFsn    | 10000 | 1422  | 2 | 285  |

|           |     |                      |       |       |   |      |
|-----------|-----|----------------------|-------|-------|---|------|
| Stage II  | B27 | 03D-5th-SAGA-020AFsn | 10000 | 223   | 5 | 71   |
| Stage 0-I | C01 | 2S06A-PFU023AFsn-1   | 10000 | 3977  | 1 | 555  |
| Stage 0-I | C02 | 01A-5th-SAGA-001AFsn | 10000 | 163   | 4 | 118  |
| Stage 0-I | C03 | 06F-5th-FU674AFsn    | 10000 | 2745  | 3 | 133  |
| Stage 0-I | C04 | 01B-5th-SAGA-002AFsn | 10000 | 1793  | 4 | 2016 |
| Stage 0-I | C05 | 2S05F-FU038AFsn-1    | 10000 | 6264  | 1 | 391  |
| Stage 0-I | C06 | 2S05C-PFU112AFsn-1   | 10000 | 5678  | 1 | 710  |
| Stage 0-I | C07 | 2S11D-FU130AFsn      | 10000 | 5904  | 1 | 430  |
| Stage 0-I | C08 | 2S04F-FU107AFsn      | 20000 | 14332 | 3 | 767  |
| Stage 0-I | C09 | 2S05A-PFU006AFsn-1   | 10000 | 5608  | 2 | 100  |
| Stage 0-I | C10 | 2S05H-FU058AFsn-1    | 10000 | 6061  | 0 | 79   |
| Stage 0-I | C11 | 01E-5th-SAGA-005AFsn | 10000 | 60    | 1 | 11   |
| Stage 0-I | C12 | 2S05D-PFU002AFsn-1   | 10000 | 6852  | 2 | 17   |
| Stage 0-I | C13 | 06E-5th-FU621AFsn    | 10000 | 1963  | 1 | 93   |
| Stage 0-I | C14 | 2S05E-PFU005AFsn-1   | 10000 | 5795  | 0 | 607  |
| Stage 0-I | C15 | 05F-5th-FU314AFsn    | 10000 | 3066  | 2 | 25   |

|           |       |                                |       |       |   |      |
|-----------|-------|--------------------------------|-------|-------|---|------|
| Stage 0-I | C16   | 2S04H-PFU041AFsn-1             | 10000 | 5405  | 2 | 224  |
| Stage 0-I | C17   | 2S05G-PFU007AFsn-1             | 20000 | 14637 | 3 | 124  |
| Stage 0-I | C18   | 2S04G-PFU090AFsn-1             | 7423  | 4747  | 2 | 392  |
| Stage 0-I | C19   | 2S05B-PFU091AFsn-1             | 10000 | 6217  | 1 | 730  |
| Stage 0-I | C20   | 07A-5th-FU800AFsn              | 10000 | 1932  | 2 | 544  |
| Normal AF | D01   | 2S06F-PFU061AFsn-2             | 39671 | 33690 | 3 | 2840 |
| Normal AF | D01-2 | 10A-5th-D01-2S06F-PFU061AFsn-2 | 10000 | 2603  | 3 | 2    |
| Normal AF | D02   | 2S06G-PFU101AFsn-1             | 10000 | 6805  | 0 | 72   |
| Normal AF | D02-2 | 10B-5th-D02-2S06G-PFU101AFsn-1 | 10000 | 2416  | 3 | 6    |
| Normal AF | D03   | 2S08D-FU057AFsn-1              | 12100 | 9819  | 2 | 108  |
| Normal AF | D03-2 | 10C-5th-D03-2S08D-FU057AFsn-1  | 10000 | 2703  | 1 | 18   |
| Normal AF | D04   | 2S06D-PFU047AFsn-2             | 10000 | 4270  | 2 | 285  |
| Normal AF | D04-2 | 10D-5th-D04-2S06D-PFU047AFsn-2 | 10000 | 2200  | 2 | 90   |
| Normal AF | D05   | 2S08A-FU031AFsn-1              | 20000 | 14046 | 0 | 50   |
| Normal AF | D05-2 | 10E-5th-D05-2S08A-FU031AFsn-1  | 10000 | 1305  | 3 | 25   |
| Normal AF | D06   | 2S07D-PFU092AFsn-1             | 18387 | 16954 | 3 | 69   |

|           |       |                                |       |       |   |     |
|-----------|-------|--------------------------------|-------|-------|---|-----|
| Normal AF | D06-2 | 10F-5th-D06-2S07D-PFU092AFsn-1 | 10000 | 2764  | 1 | 28  |
| Normal AF | D07   | 2S06E-FU081AFsn-1              | 10000 | 6130  | 2 | 40  |
| Normal AF | D07-2 | 10G-5th-D07-2S06E-FU081AFsn-1  | 10000 | 2674  | 0 | 9   |
| Normal AF | D08   | 2S06B-PFU052AFsn-2             | 20000 | 13791 | 1 | 285 |
| Normal AF | D08-2 | 10H-5th-D08-2S06B-PFU052AFsn-2 | 10000 | 1359  | 3 | 28  |
| Normal AF | D09   | 2S06H-PFU104AFsn-1             | 10000 | 6477  | 3 | 149 |
| Normal AF | D09-2 | 11A-5th-D09-2S06H-PFU104AFsn-1 | 10000 | 2567  | 2 | 8   |
| Normal AF | D10   | 2S07H-PFU079AFsn-1             | 10000 | 898   | 1 | 62  |
| Normal AF | D10-2 | 11B-5th-D10-2S07H-PFU079AFsn-1 | 10000 | 2264  | 1 | 37  |
| Normal AF | D11   | 2S06C-PFU108AFsn-1             | 10000 | 6843  | 1 | 91  |
| Normal AF | D12   | 2S07F-PFU109AFsn-1             | 35677 | 32298 | 7 | 258 |
| Normal AF | D13   | 2S07E-PFU105AFsn-1             | 10000 | 6315  | 0 | 31  |
| Normal AF | D14   | 2S07G-PFU103AFsn-1             | 20000 | 14390 | 3 | 483 |
| Normal AF | D15   | 2S08B-FU019AFsn-1              | 7355  | 5810  | 5 | 38  |
| Normal AF | D16   | 2S07C-PFU102AFsn-1             | 10000 | 6606  | 0 | 175 |
| Normal AF | D17   | 2S07A-PFU055AFsn-1             | 20000 | 14748 | 3 | 70  |



|           |       |                                 |       |       |   |     |
|-----------|-------|---------------------------------|-------|-------|---|-----|
| Normal AF | D18   | 2S07B-PFU107AFsn-1              | 20000 | 14288 | 3 | 209 |
| Blank     | N01   | 2S08E-NCQP141204-1              | 10000 | 606   | 2 | 0   |
| Blank     | N01-2 | 11C-5th-N01d-2S08E-NCQP141204-1 | 10000 | 282   | 1 | 1   |
| Blank     | N02   | 2S08G-NCQP141209-1              | 10000 | 5648  | 2 | 139 |
| Blank     | N02-2 | 11D-5th-N02d-2S08G-NCQP141209-1 | 10000 | 2627  | 1 | 6   |
| Blank     | N03   | 2S08H-NCQP141210-1              | 10000 | 1399  | 1 | 63  |
| Blank     | N03-2 | 11E-5th-N03d-2S08H-NCQP141210-1 | 10000 | 5245  | 1 | 3   |
| Blank     | N04   | 2S09A-NCQP141211-1              | 12362 | 8993  | 0 | 4   |
| Blank     | N04-2 | 11F-5th-N04d-2S09A-NCQP141211-1 | 10000 | 2853  | 0 | 20  |
| Blank     | N05   | 2S09B-NCQP150107-1              | 6411  | 3973  | 1 | 8   |
| Blank     | N05-2 | 11G-5th-N05d-2S09B-NCQP150107-1 | 10000 | 3197  | 0 | 1   |
| Blank     | N06   | 2S09C-NCQP150116-1              | 6505  | 4247  | 1 | 8   |
| Blank     | N06-2 | 11H-5th-N06d-2S09C-NCQP150116-1 | 10000 | 936   | 3 | 2   |
| Blank     | N07   | 2S12E-NCQP151023-1              | 20000 | 14586 | 1 | 41  |
| Blank     | N07-2 | 12A-5th-N07d-2S12E-NCQP151023-1 | 10000 | 1637  | 0 | 5   |
| Blank     | N08   | 2S09G-1NCPCR                    | 5237  | 3299  | 2 | 7   |

|       |       |                             |       |       |   |     |
|-------|-------|-----------------------------|-------|-------|---|-----|
| Blank | N08-2 | 12B-5th-N08s-2S09G-1NCPCR   | 10000 | 2123  | 1 | 2   |
| Blank | N09   | 2S09D-2NCPCR-1              | 4135  | 2446  | 0 | 4   |
| Blank | N09-2 | 12C-5th-N09s-2S09D-2NCPCR-1 | 10000 | 1801  | 1 | 2   |
| Blank | N10   | 2S09E-2NCPCR-2              | 5426  | 3973  | 1 | 11  |
| Blank | N10-2 | 12D-5th-N10s-2S09E-2NCPCR-2 | 10000 | 1635  | 1 | 3   |
| Blank | N12   | 2S12F-3NCPCR-1              | 20000 | 15476 | 2 | 33  |
| Blank | N13   | 2S12G-3NCPCR-2              | 10000 | 6395  | 0 | 8   |
| Blank | N14   | 2S12H-3NCPCR-3              | 10000 | 4634  | 3 | 14  |
| Blank | N15   | 03G-5th-170607QPN1          | 10000 | 2573  | 2 | 8   |
| Blank | N16   | 03H-5th-170607QPN2          | 10000 | 2249  | 0 | 155 |
| Blank | N17   | 05C-5th-160815QPN1          | 10000 | 814   | 1 | 1   |
| Blank | N18   | 05D-5th-160815QPN2          | 10000 | 3605  | 2 | 8   |
| Blank | N19   | 07B-5th-170609QPN1          | 10000 | 2786  | 1 | 0   |
| Blank | N20   | 07C-5th-170609QPN2          | 10000 | 1344  | 1 | 2   |
| Blank | N21   | 12E-5th-NCPCR-1             | 10000 | 2297  | 2 | 4   |
| Blank | N22   | 12F-5th-NCPCR-2             | 10000 | 4217  | 2 | 3   |

|       |     |                 |       |      |   |   |
|-------|-----|-----------------|-------|------|---|---|
| Blank | N23 | 12G-5th-NCPCR-3 | 10000 | 1960 | 2 | 2 |
| Blank | N24 | 12H-5th-NCPCR-4 | 10000 | 3497 | 3 | 5 |
